# Supplementary material for: Size-Dependent Superconducting Properties of In Nanowire Arrays
Source: MDPI journal article supplement (doi:10.3390/nano12224095), 2022-11-21
Supplement: s1 [file s1]

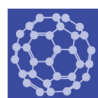

## Supplementary Materials

## Size-Dependent Superconducting Properties of In Nanowire Arrays

Alexey A. Noyan <sup>1,2</sup>, Yevgeniy A. Ovchenkov <sup>2</sup>, Valery V. Ryazanov <sup>3,4</sup>, Igor A. Golovchanskiy <sup>1,4</sup>,  
Vasily S. Stolyarov <sup>1,4</sup>, Eduard E. Levin <sup>2</sup> and Kirill S. Napolskii <sup>2,4,\*</sup>

<sup>1</sup> Moscow Institute of Physics and Technology, 141700 Dolgoprudny, Russia;

<sup>2</sup> Lomonosov Moscow State University, 119991 Moscow, Russia

<sup>3</sup> Institute of Solid State Physics RAS, 142432 Chernogolovka, Russia

<sup>4</sup> National University of Science and Technology MISIS, 119049 Moscow, Russia

\* Correspondence: kirill@inorg.chem.msu.ru

**Citation:** Noyan, A.A.; Ovchenkov, Y.A.; Ryazanov, V.V.; Golovchanskiy, I.A.; Stolyarov, V.S.; Levin, E.E.; Napolskii, K.S. Size-Dependent Superconducting Properties of In Nanowire Arrays. *Nanomaterials* **2022**, *12*, 4095. <https://doi.org/10.3390/nano1224095>

Academic Editors: Gang Xiang and Hongtao Ren

Received: 20 October 2022

Accepted: 14 November 2022

Published: 21 November 2022

**Publisher's Note:** MDPI stays neutral with regard to jurisdictional claims in published maps and institutional affiliations.

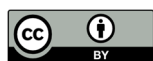

**Copyright:** © 2022 by the author. Licensee MDPI, Basel, Switzerland. This article is an open access article distributed under the terms and conditions of the Creative Commons Attribution (CC BY) license (<https://creativecommons.org/licenses/by/4.0/>).

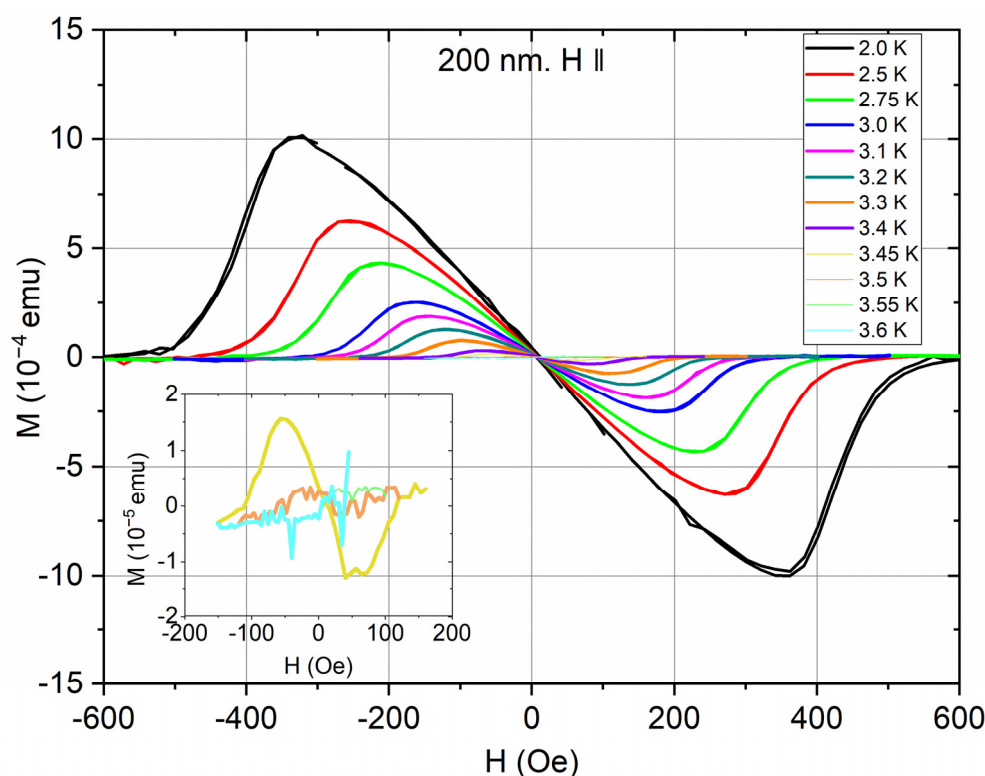

**Figure S1.** The magnetic moment  $M$  as a function of axial magnetic field  $H$  for the arrays of nanowires with diameter of 200 nm.

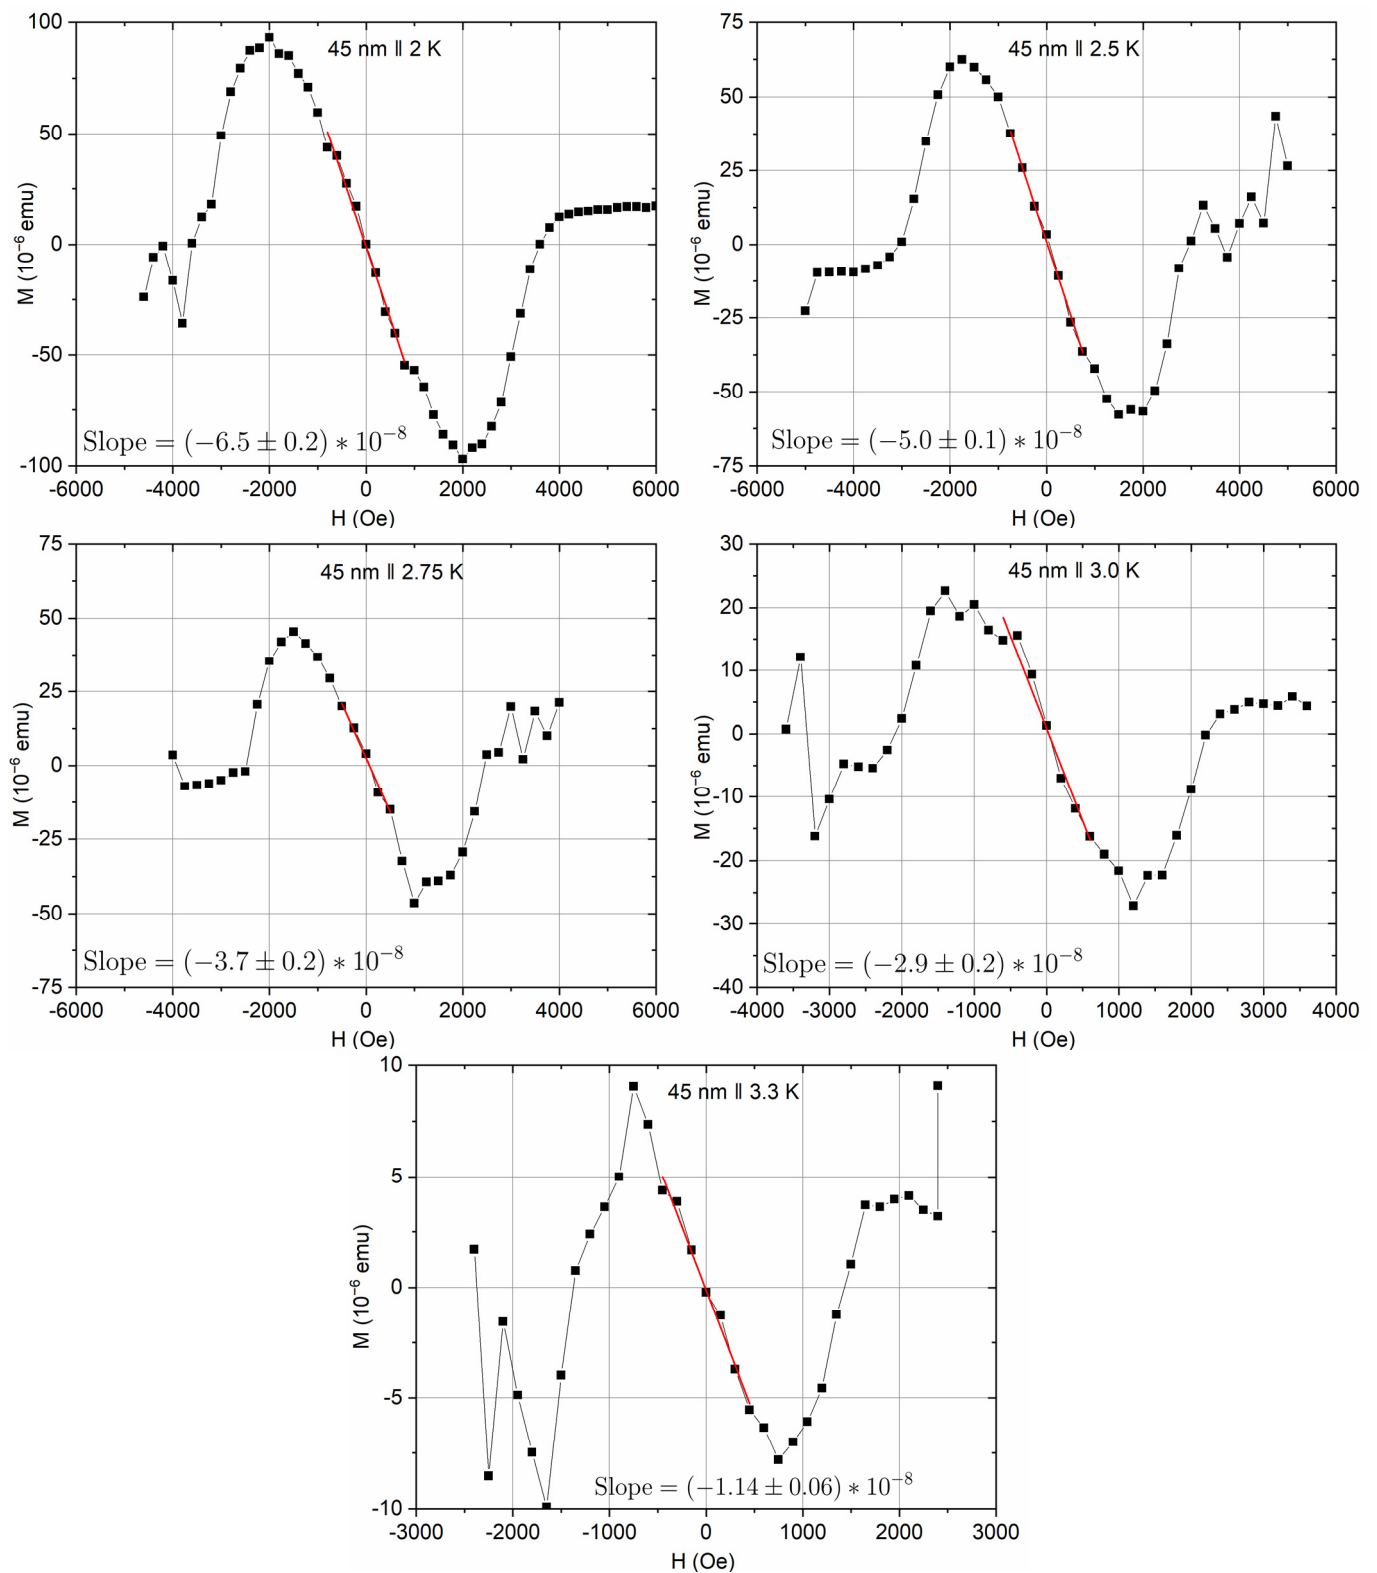

**Figure S2.** The magnetic moment  $M$  as a function of axial magnetic field  $H$  for the arrays of nanowires with diameter of 45 nm.

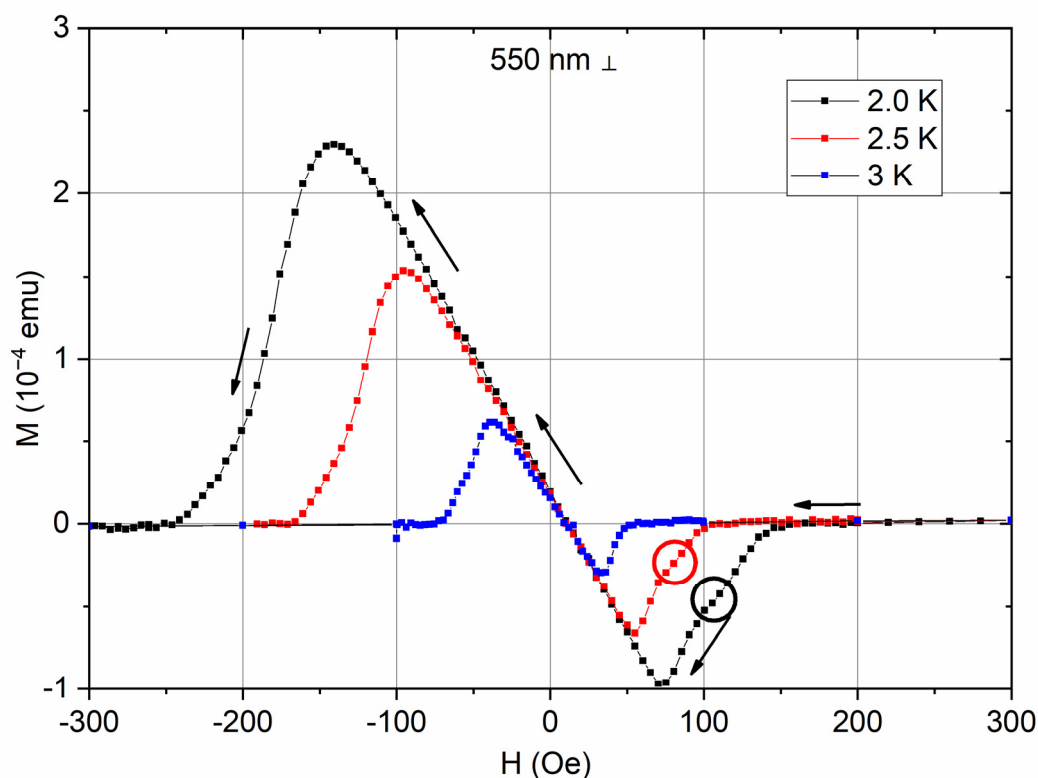

**Figure S3.** The magnetic moment  $M$  of the arrays of nanowires with diameter of 550 nm as a function of magnetic field  $H$  applied perpendicular to the nanowires. Arrows show how the field was changing. The features of the curves are marked with circles.

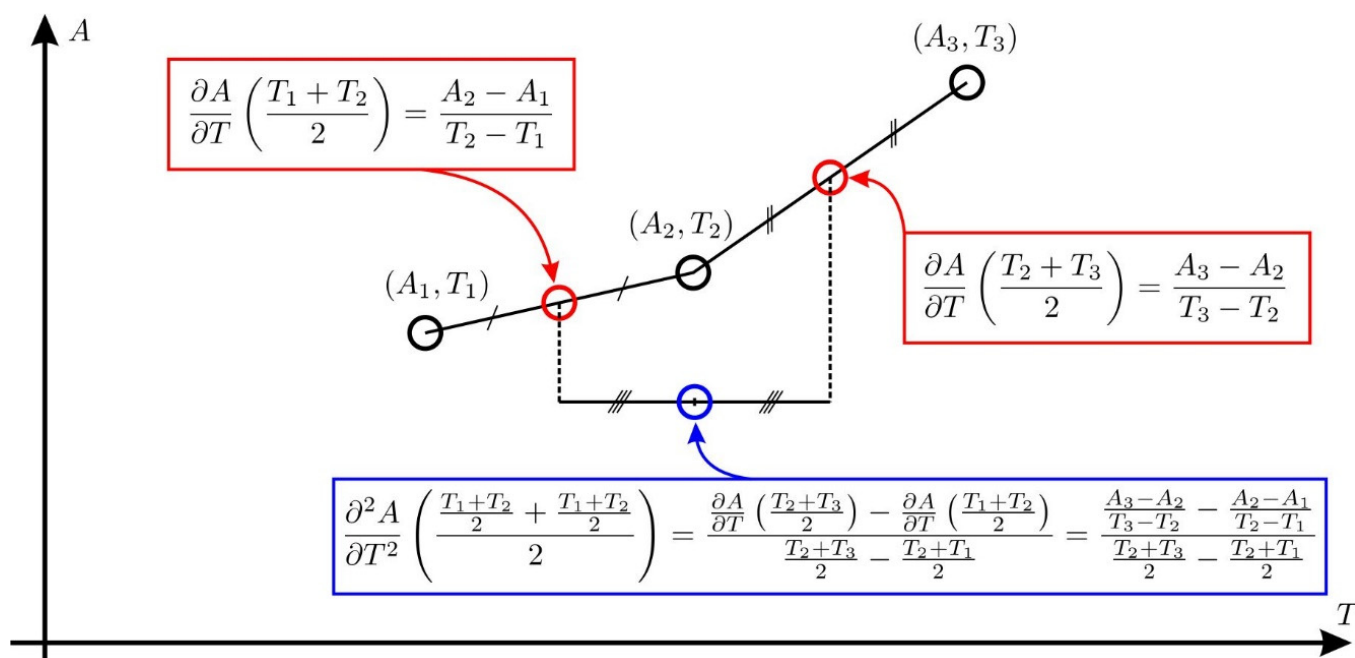

**Figure S4.** Scheme of equation (11) derivation.
